# Supplementary material for: Reconstruction of the Vancomycin-Susceptible Staphylococcus aureus Phenotype From a Vancomycin-Intermediate S. aureus XN108
Source: Front Microbiol. 2018 Nov 28;9:2955. doi: 10.3389/fmicb.2018.02955 (PMC6279853; doi:10.3389/fmicb.2018.02955)
Supplement: Supplementary file 3 [file Table_2.XLSX]

## Sheet: Sheet1
Supplementary Table S4. Differentailly regulated genes KS65 compared to XN108.
Gene_id	FoldChange	padj	Description
Up regulated
SAXN108_0010	1.94549	1.6231e-27	Histidine ammonia-lyase
SAXN108_0044	1.64107	4.7034e-09	Glycerophosphoryl diester phosphodiesterase
SAXN108_0049	1.54381	0.0015835	MarR family regulatory protein
SAXN108_0053	4.05032	0.00050659	hypothetical protein
SAXN108_0054	2.23855	5.2132e-08	hypothetical protein
SAXN108_0056	1.85079	2.6399e-38	Cadmium-transporting ATPase
SAXN108_0075	1.65218	0.035997	hypothetical protein
SAXN108_0076	1.56316	5.5786e-05	hypothetical protein
SAXN108_0083	1.53693	0.0093756	hypothetical protein
SAXN108_0096	10.3989	1.6498e-208	immunoglobulin G binding protein A
SAXN108_0097	1.75442	1.8198e-23	HTH-type transcriptional regulator SarS
SAXN108_0114	3.14523	1.8163e-07	NAD dependent epimerase/dehydratase family protein
SAXN108_0129	1.63247	0.00099258	Phosphonate ABC transporter phosphate-binding periplasmic component
SAXN108_0171	1.55354	1.9787e-09	Branched-chain amino acid transport system carrier protein
SAXN108_0173	1.63305	2.2887e-22	putative thiamine pyrophosphate enzyme
SAXN108_0176	3.06379	1.6361e-26	hypothetical protein
SAXN108_0177	3.22364	3.812e-42	hypothetical protein
SAXN108_0178	2.5784	5.1414e-45	sucrose-specific PTS transporter protein
SAXN108_0179	2.14072	7.7839e-60	Sialic acid utilization regulator%2C RpiR family
SAXN108_0187	2.48866	6.3699e-10	putative phosphodiesterase
SAXN108_0197	3.92156	4.0246e-133	putative sugar phosphate transport protein
SAXN108_0239	1.93295	1.3389e-40	cell wall metabolism protein
SAXN108_0242	2.39181	3.9578e-12	holin-like protein
SAXN108_0243	1.60005	2.049e-21	holin-like protein
SAXN108_0259	1.56063	0.0018629	hypothetical protein
SAXN108_0305	2.20856	1.0718e-49	Triacylglycerol lipase
SAXN108_0306	1.74839	3.7635e-16	Triacylglycerol lipase
SAXN108_0313	2.10731	0.0037765	hypothetical protein
SAXN108_0314	1.82736	0.00011916	hypothetical protein
SAXN108_0315	1.77874	0.034099	Phage protein
SAXN108_0364	2.27482	5.1302e-18	phage protein
SAXN108_0366	2.50984	2.3843e-09	hypothetical protein
SAXN108_0367	3.115	3.1627e-34	hypothetical protein
SAXN108_0368	2.38204	0.0082523	holin
SAXN108_0369	3.58032	1.9004e-19	N-acetylmuramoyl-L-alanine amidase
SAXN108_0385	1.71711	2.2025e-15	Glycerol-3-phosphate transporter
SAXN108_0398	1.8617	0.0094771	hypothetical protein
SAXN108_0403	2.04801	0.01347	hypothetical protein
SAXN108_0421	1.61337	0.0001872	hypothetical protein
SAXN108_0423	2.05413	6.0904e-29	hypothetical protein
SAXN108_0439	1.65027	8.3984e-21	Inosine-5'-monophosphate dehydrogenase
SAXN108_0474	1.7559	9.0784e-05	hypothetical protein
SAXN108_0509	2.10886	9.9385e-06	Sodium-dependent transporter
SAXN108_0512	2.37982	0.0017137	Methionine ABC transporter ATP-binding protein
SAXN108_0514	1.71797	7.2758e-06	putative lipoprotein
SAXN108_0515	4.30022	1.7548e-113	putative exported protein
SAXN108_0521	2.95668	0.00029198	LysR family regulatory protein
SAXN108_0545	2.08556	3.6494e-50	Veg protein
SAXN108_0546	1.52017	2.6908e-12	4-diphosphocytidyl-2-C-methyl-D-erythritol kinase
SAXN108_0582	1.97549	3.0893e-16	Serine acetyltransferase
SAXN108_0588	1.89594	0.0013856	hypothetical protein
SAXN108_0603	1.87377	2.6804e-07	N-acetyl-L%2CL-diaminopimelate deacetylase
SAXN108_0605	1.52508	5.7098e-16	chaperone protein HchA
SAXN108_0613	2.16237	0.0031369	Deoxyadenosine kinase / Deoxyguanosine kinase
SAXN108_0617	1.74196	0.0048568	serine-aspartate repeat-containing protein C
SAXN108_0623	1.77082	1.2007e-12	GTP cyclohydrolase I type2
SAXN108_0624	2.16984	6.1213e-19	hypothetical protein
SAXN108_0625	1.78353	4.404e-09	hypothetical protein
SAXN108_0668	1.94347	1.1937e-05	hypothetical protein
SAXN108_0671	2.08152	3.7397e-60	Alcohol dehydrogenase
SAXN108_0672	1.88493	9.0784e-05	hypothetical protein
SAXN108_0702	1.53212	2.1839e-05	teichoic acid biosynthesis protein
SAXN108_0723	1.60877	6.4997e-09	hypothetical protein
SAXN108_0724	1.84956	8.1797e-18	Acetyltransferase GNAT family
SAXN108_0732	2.14909	7.2367e-63	Secretory antigen precursor SsaA
SAXN108_0744	2.24879	9.3347e-10	hypothetical protein
SAXN108_0764	5.70332	1.5475e-160	hypothetical protein
SAXN108_0765	1.74725	0.0098115	Cys-tRNAPro deacylase YbaK
SAXN108_0775	1.54448	6.7976e-23	hypothetical protein
SAXN108_0776	1.99559	2.5082e-58	hypothetical protein
SAXN108_0787	1.50854	1.9085e-06	ATPase components of ABC transporters with duplicated ATPase domains
SAXN108_0815	1.50475	0.00014753	hypothetical protein
SAXN108_0850	1.54457	7.0215e-05	hypothetical protein
SAXN108_0852	1.58044	0.0003903	hypothetical protein
SAXN108_0859	1.73311	0.0090749	hypothetical protein
SAXN108_0871	1.66941	4.7949e-17	Organic hydroperoxide resistance protein
SAXN108_0874	2.24583	1.3986e-15	Thioredoxin
SAXN108_0898	1.71851	0.014108	hypothetical protein in superantigen-encoding pathogenicity islands SaPI
SAXN108_0899	1.6888	0.0017931	hypothetical protein in superantigen-encoding pathogenicity islands SaPI
SAXN108_0904	2.9053	1.4068e-15	hypothetical protein
SAXN108_0905	2.00405	6.8567e-15	Pathogenicity island protein
SAXN108_0906	1.50822	6.563e-05	hypothetical protein
SAXN108_0907	2.0976	7.6476e-32	hypothetical protein
SAXN108_0934	1.60387	2.1609e-05	hypothetical protein
SAXN108_0954	1.81276	1.2963e-12	Glycerophosphoryl diester phosphodiesterase%2C periplasmic
SAXN108_0980	1.66418	1.7397e-12	Oligopeptide transport system permease protein OppB
SAXN108_0981	1.97065	4.2196e-12	Oligopeptide transport system permease protein OppC
SAXN108_0982	1.73094	8.2047e-07	Oligopeptide transport ATP-binding protein OppD
SAXN108_0992	2.04041	1.0308e-22	Tryptophanyl-tRNA synthetase
SAXN108_0993	1.66733	1.0676e-32	regulatory protein spx
SAXN108_1022	2.1082	0.0013317	Competence transcription factor
SAXN108_1030	1.72351	3.4774e-09	hypothetical protein
SAXN108_1031	4.98308	1.1037e-12	hypothetical protein
SAXN108_1032	2.47371	7.9433e-22	glycosyl transferase%2C group 1 family protein
SAXN108_1061	3.65189	2.5765e-42	Phosphoribosylaminoimidazole carboxylase catalytic subunit
SAXN108_1062	3.40411	5.7384e-17	Phosphoribosylaminoimidazole carboxylase ATPase subunit
SAXN108_1063	5.05666	1.3548e-22	Phosphoribosylaminoimidazole-succinocarboxamide synthase%2C PurS subunit
SAXN108_1064	2.76529	0.0058051	Phosphoribosylformylglycinamidine synthase%2C PurS subunit
SAXN108_1065	3.4144	3.9539e-05	Phosphoribosylformylglycinamidine synthase%2C glutamine amidotransferase subunit
SAXN108_1066	3.75353	8.5745e-17	phosphoribosylformylglycinamidine synthase II
SAXN108_1067	2.90934	6.4977e-23	Amidophosphoribosyltransferase
SAXN108_1068	3.11598	7.9743e-13	Phosphoribosylformylglycinamidine cyclo-ligase
SAXN108_1069	3.05558	2.0532e-11	Phosphoribosylglycinamide formyltransferase
SAXN108_1070	2.82457	6.7041e-16	IMP cyclohydrolase / Phosphoribosylaminoimidazolecarboxamide formyltransferase
SAXN108_1071	2.55506	7.283e-51	Phosphoribosylamine--glycine ligase
SAXN108_1082	1.97117	1.0428e-14	Cytochrome d ubiquinol oxidase subunit I
SAXN108_1083	1.52822	1.0401e-05	Cytochrome d ubiquinol oxidase subunit II
SAXN108_1103	2.016	2.2862e-18	hypothetical protein
SAXN108_1106	1.62405	0.011239	hypothetical protein
SAXN108_1107	2.04523	1.6796e-13	hypothetical protein
SAXN108_1108	3.29631	3.8056e-94	hypothetical protein
SAXN108_1112	1.81209	2.7342e-30	protoheme IX farnesyltransferase COX10-CtaB
SAXN108_1113	1.55884	5.7711e-13	hypothetical protein
SAXN108_1123	1.59163	6.6696e-06	50S ribosomal protein L32
SAXN108_1149	1.71257	3.8024e-34	hypothetical protein
SAXN108_1150	1.67522	7.0985e-10	hypothetical protein
SAXN108_1151	2.02831	5.6353e-15	hypothetical protein
SAXN108_1153	2.24694	5.1423e-71	fibrinogen-binding protein
SAXN108_1154	2.25762	5.3844e-62	fibrinogen-binding protein
SAXN108_1161	2.02574	0.0035962	hypothetical protein
SAXN108_1165	3.13989	8.2976e-27	Ornithine carbamoyltransferase
SAXN108_1166	2.58294	4.0031e-23	Carbamate kinase
SAXN108_1170	3.09012	0.0021844	hypothetical protein
SAXN108_1171	83.6689	4.6148e-118	antibacterial protein
SAXN108_1172	27.9022	7.4831e-17	antibacterial protein
SAXN108_1239	2.60004	3.6087e-33	SSU ribosomal protein S16p
SAXN108_1240	1.73416	0.00064107	16S rRNA processing protein RimM
SAXN108_1241	1.60542	0.00098913	tRNA Guanine37-N1 -methyltransferase
SAXN108_1244	1.73068	3.1485e-05	GTPase
SAXN108_1290	1.59461	2.9657e-20	RecA protein
SAXN108_1309	1.54669	4.9048e-05	RNA-binding protein Hfq
SAXN108_1333	1.58071	0.020195	hypothetical protein
SAXN108_1344	1.63024	7.8428e-10	Aspartokinase
SAXN108_1349	1.54455	8.6666e-15	hypothetical protein
SAXN108_1364	2.05097	9.4322e-30	Large-conductance mechanosensitive channel
SAXN108_1380	2.21292	9.3032e-06	DNA polymerase V
SAXN108_1392	1.74101	0.00012752	putative hydrolase
SAXN108_1453	1.74165	0.0003196	hypothetical protein
SAXN108_1457	2.28693	8.8463e-09	putative transporter
SAXN108_1458	3.33534	2.2759e-30	Amino acid permease
SAXN108_1459	3.65605	4.6322e-30	Threonine dehydratase%2C catabolic
SAXN108_1460	4.31915	1.0395e-18	Alanine dehydrogenase
SAXN108_1463	1.50823	0.0045032	hypothetical protein
SAXN108_1493	2.17396	5.8884e-06	Heptaprenyl diphosphate synthase component I
SAXN108_1520	1.58617	1.1827e-11	integrase/recombinase
SAXN108_1533	1.64202	5.9781e-10	Glyoxalase/bleomycin resistance protein/dioxygenase superfamily protein
SAXN108_1536	2.86407	1.4222e-07	hypothetical protein
SAXN108_1561	1.70411	1.0739e-06	Shikimate kinase I
SAXN108_1636	1.78316	1.8967e-18	hypothetical protein
SAXN108_1637	2.28664	1.6421e-21	hypothetical protein
SAXN108_1644	1.613	4.1166e-17	hypothetical protein
SAXN108_1645	1.75954	9.3289e-12	hypothetical protein
SAXN108_1651	1.51283	4.4866e-08	putative oxygenase
SAXN108_1652	1.64652	0.00013311	hypothetical protein
SAXN108_1653	1.5314	1.8296e-08	hypothetical protein
SAXN108_1706	1.75293	2.0702e-07	50S ribosomal protein L35
SAXN108_1707	1.59075	6.1446e-20	Translation initiation factor 3
SAXN108_1709	1.7224	0.01191	Threonyl-tRNA synthetase
SAXN108_1713	2.76019	1.2147e-97	NADPH-dependent glyceraldehyde-3-phosphate dehydrogenase
SAXN108_1769	1.58555	6.3692e-25	hypothetical protein
SAXN108_1805	1.50367	1.0753e-13	Autolysin
SAXN108_1811	1.96077	7.5063e-36	Transaldolase
SAXN108_1812	1.85661	1.6709e-05	hypothetical protein
SAXN108_1826	3.2702	0.00041174	hypothetical protein
SAXN108_1827	2.64144	1.0063e-58	hypothetical protein
SAXN108_1828	2.56513	2.0799e-80	hypothetical protein
SAXN108_1829	2.90854	2.8152e-11	hypothetical protein
SAXN108_1838	1.58239	0.0024015	Type I restriction-modification system%2C specificity subunit S
SAXN108_1858	1.58558	0.0019698	hypothetical protein
SAXN108_1869	1.95106	0.00032681	hypothetical protein
SAXN108_1888	1.95726	1.5058e-22	hypothetical protein
SAXN108_1892	1.52676	4.1379e-05	AhpC/TSA family protein
SAXN108_1907	1.90794	6.3675e-15	hypothetical protein
SAXN108_1908	2.07848	0.0022878	hypothetical protein
SAXN108_1924	6.31097	0.0053944	Phage protein
SAXN108_1925	13.3847	0.0037126	Phage protein
SAXN108_1930	4.32246	1.4915e-05	Phage major capsid protein
SAXN108_1931	3.80905	0.0016373	phage protein
SAXN108_1991	1.63937	1.6658e-25	Ferritin
SAXN108_1994	1.57288	1.035e-19	hypothetical protein
SAXN108_2015	2.00462	1.6096e-22	Nitric oxide synthase oxygenase
SAXN108_2016	1.66205	1.3182e-07	Prephenate dehydratase
SAXN108_2019	1.63789	8.8469e-13	isochorismatase family protein
SAXN108_2025	1.95091	0.00087982	hypothetical protein
SAXN108_2038	1.66607	0.027364	hypothetical protein
SAXN108_2091	2.46109	0.00030422	ATPase involved in DNA repair%2C phage associated
SAXN108_2124	1.63985	1.7787e-10	serine-aspartate repeat family protein%2C SdrH
SAXN108_2125	1.64186	1.5661e-12	Membrane anchored protein
SAXN108_2126	2.5201	1.2371e-35	Nitroreductase family protein
SAXN108_2128	5.40558	1.1684e-76	delta-hemolysin precursor
SAXN108_2129	4.53517	3.0621e-251	Accessory gene regulator B
SAXN108_2130	4.26038	3.1153e-110	Accessory gene regulator D pheromone precursor%2C type III
SAXN108_2131	4.55803	2.7232e-203	accessory regulator protein C
SAXN108_2132	4.39849	7.3343e-169	accessory gene regulator protein A
SAXN108_2296	1.68792	0.00022436	Dihydroxy-acid dehydratase
SAXN108_2326	1.53624	2.4345e-16	ATP-dependent RNA helicase
SAXN108_2376	1.534	2.1635e-06	hypothetical protein
SAXN108_2378	1.6142	1.4175e-05	putative peptidase
SAXN108_2389	1.66213	1.5127e-08	Mannose-6-phosphate isomerase%2C class I
SAXN108_2408	1.50719	2.0815e-15	Arginase
SAXN108_2415	1.59311	2.7882e-05	hypothetical protein
SAXN108_2419	1.55579	4.7042e-10	hypothetical protein
SAXN108_2420	2.58634	2.0332e-39	hypothetical protein
SAXN108_2442	4.61153	3.2358e-65	6-phospho-beta-galactosidase
SAXN108_2443	3.74835	7.2583e-42	PTS system%2C lactose-specific IIBC components
SAXN108_2444	3.86807	6.7116e-40	PTS system%2C lactose-specific IIA component
SAXN108_2445	3.36211	1.4054e-18	Tagatose 1%2C6-diphosphate aldolase
SAXN108_2446	2.64017	2.1061e-11	Tagatose-6-phosphate kinase
SAXN108_2447	2.64716	8.3862e-31	Galactose-6-phosphate isomerase%2C LacB subunit
SAXN108_2448	2.24502	3.0637e-16	Galactose-6-phosphate isomerase%2C LacA subunit
SAXN108_2549	1.51162	2.1483e-10	D-octopine dehydrogenase
SAXN108_2550	1.61387	0.00015296	hypothetical protein
SAXN108_2551	2.88431	7.5599e-38	hypothetical protein
SAXN108_2572	1.59013	0.022738	Transcriptional regulator%2C RpiR family
SAXN108_2578	1.59895	0.00011329	putative peptidase
SAXN108_2580	1.73934	3.669e-30	Urocanate hydratase
SAXN108_2581	1.92568	4.931e-05	LysR family regulatory protein
SAXN108_2582	2.23953	0.041443	Fosfomycin resistance protein FosB
SAXN108_2585	1.95498	4.9247e-19	hypothetical protein
SAXN108_2604	1.68635	0.00030893	TetR family regulatory protein of MDR cluster
SAXN108_2628	1.67803	6.1522e-09	hypothetical protein
SAXN108_2637	1.59101	8.7749e-08	hypothetical protein
SAXN108_2639	2.35043	3.3683e-10	hypothetical protein
SAXN108_2642	1.70991	3.3777e-06	Nitrate/nitrite transporter
SAXN108_2651	1.63605	9.9657e-06	nitrate reductase subunit beta
SAXN108_2653	1.52917	1.9615e-06	tetrapyrrole (corrin/porphyrin) methylase familyprotein
SAXN108_2658	1.79582	3.9924e-14	putative nitrite transporter
SAXN108_2660	2.23326	0.0058051	hypothetical protein
SAXN108_2664	2.08545	0.00022464	putative lipoprotein
SAXN108_2665	2.16322	2.416e-05	hypothetical protein
SAXN108_2674	2.01116	1.4185e-54	Gamma-hemolysin component A
SAXN108_2676	1.9757	9.353e-36	Gamma-hemolysin component C
SAXN108_2677	1.81899	9.5206e-10	Gamma-hemolysin component B
SAXN108_2689	1.5822	5.2919e-11	putative transporter protein
SAXN108_2712	1.54757	0.034497	hypothetical protein
SAXN108_2713	1.50708	9.286e-13	hypothetical protein
SAXN108_2728	1.5283	9.0354e-06	hypothetical protein
SAXN108_2731	1.65903	3.7381e-07	putative short chain dehydrogenase
SAXN108_2733	1.79126	1.044e-41	hypothetical protein
SAXN108_2748	2.12088	0.00051816	Fibronectin binding protein FnbB
SAXN108_2750	1.95406	1.6857e-07	Fibronectin binding protein FnbA
SAXN108_2771	2.17833	6.2502e-17	bleomycin resistance protein
SAXN108_2772	1.81126	2.9225e-29	nitroreductase family protein
SAXN108_2773	2.71696	3.574e-115	D-lactate dehydrogenase
SAXN108_2793	5.03204	4.3707e-60	hypothetical protein
SAXN108_2797	1.6845	1.1178e-07	putative 6-O-methylguanine DNAmethyltransferase
SAXN108_2803	1.68944	8.1488e-05	TetR family regulatory protein
SAXN108_2819	2.39177	8.0439e-54	immunodominant antigen A
SAXN108_2862	1.63083	0.0099851	hypothetical protein
SAXN108_2891	1.81603	9.2794e-08	Glutathione peroxidase family protein
SAXN108_2892	3.80979	2.0077e-09	hypothetical protein
SAXN108_2901	3.30052	1.8798e-26	fibrinogen and keratin-10 binding surfaceanchored protein
SAXN108_2943	1.53594	3.0893e-16	lipase precursor
SAXN108_2944	2.18764	2.2082e-11	lipase precursor
SAXN108_2960	3.12044	5.1376e-05	hypothetical protein
SAXN108_2967	1.60319	0.020654	collagen adhesin
SAXN108_2984	2.48387	4.3473e-07	hypothetical protein
SAXN108_2985	1.81427	0.00017	hypothetical protein
SAXN108_2991	2.17448	1.9985e-05	Ribonuclease P protein component
SAXN108_t16	2.11662	5.7779e-10	tRNA-Arg
Down-regulated
SAXN108_0014	0.59018	6.9146e-14	putative hydrolase
SAXN108_0016	0.632963	5.1612e-19	hypothetical protein
SAXN108_0022	0.599045	5.767e-19	hypothetical protein
SAXN108_0070	0.627772	1.005e-07	putative restriction enzyme
SAXN108_0071	0.534707	0.0016607	putative restriction enzyme modulator protein
SAXN108_0072	0.531303	0.0011655	hypothetical protein
SAXN108_0100	0.541555	1.6467e-08	lipoprotein
SAXN108_0107	0.637837	0.010043	siderophore biosynthesis protein SbnF
SAXN108_0110	0.606917	0.02562	hypothetical protein
SAXN108_0112	0.590932	1.7384e-08	hypothetical protein
SAXN108_0118	0.645025	0.0039112	polysaccharide biosynthesis protein
SAXN108_0135	0.316578	4.2474e-120	capsular polysaccharide synthesis enzyme
SAXN108_0136	0.283262	6.0303e-135	capsular polysaccharide synthesis enzyme
SAXN108_0137	0.292428	1.3131e-117	capsular polysaccharide synthesis enzyme
SAXN108_0138	0.26095	3.3157e-149	Capsular polysaccharide synthesis enzyme Cap8D
SAXN108_0139	0.266856	9.1433e-110	capsular polysaccharide synthesis enzyme
SAXN108_0140	0.257368	2.2084e-115	Capsular polysaccharide synthesis enzyme Cap8F
SAXN108_0141	0.232036	5.6715e-123	Capsular polysaccharide synthesis enzyme Cap8G
SAXN108_0142	0.237534	2.0261e-89	Capsular polysaccharide synthesis enzyme Cap8H
SAXN108_0143	0.205483	8.0142e-113	Capsular polysaccharide synthesis enzyme Cap8I
SAXN108_0144	0.241962	2.6707e-37	Capsular polysaccharide synthesis enzyme Cap8J
SAXN108_0145	0.207229	2.2358e-84	capsular polysaccharide synthesis enzyme
SAXN108_0146	0.202142	4.7623e-96	capsular polysaccharide synthesis enzyme
SAXN108_0147	0.232586	3.2891e-40	capsular polysaccharide synthesis enzyme
SAXN108_0148	0.183077	3.5764e-95	capsular polysaccharide synthesis enzyme
SAXN108_0149	0.229252	2.2225e-105	capsular polysaccharide synthesis enzyme
SAXN108_0150	0.249865	5.5733e-97	Capsular polysaccharide synthesis enzyme Cap8P
SAXN108_0154	0.553365	4.8934e-20	putative cation efflux system protein
SAXN108_0156	0.513188	1.3935e-12	hypothetical protein
SAXN108_0162	0.552031	0.010179	formate dehydrogenase
SAXN108_0221	0.36526	4.7986e-10	PTS system%2C maltose and glucose-specific IIC component / PTS system%2C maltose and lucose-specific IIB component
SAXN108_0223	0.221269	1.6371e-31	putative PTS multi-domain regulatorcomponent
SAXN108_0224	0.0818935	0.0020347	PTS system%2C galactitol-specific IIA component
SAXN108_0225	0.268845	0.00099258	PTS system%2C galactitol-specific IIB component
SAXN108_0226	0.175694	1.1934e-20	PTS system%2C galactitol-specific IIC component
SAXN108_0227	0.16016	1.909e-16	putative zinc-binding dehydrogenase
SAXN108_0229	0.323577	8.5775e-12	putative zinc-binding dehydrogenase
SAXN108_0236	0.637853	1.7298e-13	putative zinc-binding dehydrogenase
SAXN108_0237	0.517823	8.5822e-28	putative CDP-Glycerol:Poly(glycerophosphate) glycerophosphotransferase
SAXN108_0238	0.613092	1.8916e-22	putative glycosyl transferase
SAXN108_0246	0.560749	0.00030137	putative PTS transport system protein
SAXN108_0249	0.445396	3.2781e-68	Ribokinase
SAXN108_0250	0.485352	1.2768e-28	putative ribose transport protein
SAXN108_0251	0.46271	2.6686e-62	putative sugar transport protein
SAXN108_0252	0.656372	1.5991e-13	hypothetical protein
SAXN108_0254	0.584179	4.9321e-05	hypothetical protein
SAXN108_0262	0.645374	6.3144e-24	ESAT-6/Esx family secreted protein EsxA/YukE
SAXN108_0267	0.630027	2.4295e-05	FtsK/SpoIIIE family protein%2C putative secretion system component EssC/YukA
SAXN108_0282	0.543708	0.046986	hypothetical protein
SAXN108_0286	0.462649	3.6274e-09	hypothetical protein
SAXN108_0287	0.436995	4.9732e-09	hypothetical protein
SAXN108_0288	0.658846	4.3065e-10	hypothetical protein
SAXN108_0298	0.478835	3.6913e-22	sodium:solute symporter family protein
SAXN108_0375	0.586788	0.00017944	hypothetical protein
SAXN108_0376	0.569737	0.00024467	Lipoate-protein ligase A
SAXN108_0430	0.562857	1.7968e-33	Alkyl hydroperoxide reductase protein F
SAXN108_0441	0.656505	3.2501e-20	Integrase%2C superantigen-encoding pathogenicity islands SaPI
SAXN108_0496	0.518326	8.403e-29	hypothetical protein
SAXN108_0497	0.611546	0.0063128	hypothetical protein
SAXN108_0498	0.445165	3.4489e-16	hypothetical protein
SAXN108_0510	0.550413	0.01191	pyridoxal-phosphate dependent protein
SAXN108_0511	0.582739	3.9639e-06	putative Cys/Met metabolism PLP-dependentenzyme
SAXN108_0519	0.653681	0.01247	hypothetical protein
SAXN108_0594	0.657897	6.4093e-15	50S ribosomal protein L7/L12
SAXN108_0627	0.579851	4.9726e-28	D-arabino-3-hexulose 6-phosphate formaldehyde lyase
SAXN108_0628	0.558801	3.2418e-29	6-phospho-3-hexuloisomerase
SAXN108_0634	0.382087	0.0084561	hypothetical protein
SAXN108_0635	0.169832	2.1889e-248	hypothetical protein
SAXN108_0655	0.631626	0.0017035	repetative hypothetical protein
SAXN108_0656	0.572703	0.010179	repetative hypothetical protein
SAXN108_0659	0.57997	0.0047583	repetative hypothetical protein
SAXN108_0697	0.448045	1.5871e-15	ABC transporter permease
SAXN108_0698	0.445918	3.3301e-17	ABC transporter permease
SAXN108_0699	0.423364	1.6581e-19	ABC transporter ATP-binding protein
SAXN108_0701	0.641796	5.4185e-09	hypothetical protein
SAXN108_0729	0.57311	1.7043e-09	ABC-type transport system permease component VraG
SAXN108_0735	0.63503	0.030169	hypothetical protein
SAXN108_0743	0.629581	0.00031321	membrane protein%2C putative
SAXN108_0803	0.596599	1.1423e-06	iron complex transport system substrate-binding protein
SAXN108_0841	0.575078	3.3807e-28	Phosphoglycerate kinase
SAXN108_0842	0.58184	4.5375e-23	Triosephosphate isomerase
SAXN108_0843	0.516332	1.0572e-40	2%2C3-bisphosphoglycerate-independent phosphoglycerate mutase
SAXN108_0866	0.632485	0.0088181	hypothetical protein
SAXN108_0882	0.633233	0.00037043	hypothetical protein
SAXN108_0883	0.579843	5.7011e-13	Methionine ABC transporter substrate-binding protein
SAXN108_0885	0.641766	1.4408e-05	extracellular enterotoxin type I
SAXN108_0908	0.622575	1.1809e-07	membrane protein
SAXN108_0923	0.586615	1.9929e-15	hypothetical protein
SAXN108_0924	0.514755	3.633e-22	N-acetyl-glucosamine catabolism-like protein
SAXN108_0925	0.642578	7.6463e-18	Glyoxylate reductase / Glyoxylate reductase / Hydroxypyruvate reductase
SAXN108_0928	0.532281	1.3831e-37	D-alanyl transfer protein DltB
SAXN108_0929	0.517114	0.00040175	D-alanine--polyphosphoribitol ligase subunit2
SAXN108_0930	0.441778	1.2953e-64	Polyglycerophosphate chain D-alanine transfer protein DltD
SAXN108_0962	0.620871	1.6182e-14	ATP-dependent nuclease%2C subunit A
SAXN108_0975	0.383879	3.0399e-79	surface protein
SAXN108_1004	0.646766	0.0011383	ribosomal large subunit pseudouridine synthase D
SAXN108_1012	0.625411	2.8328e-15	hypothetical protein
SAXN108_1027	0.602231	0.042468	membrane protein
SAXN108_1042	0.355106	0.011223	2-succinyl-6-hydroxy-2%2C4-cyclohexadiene-1-carboxylate synthase
SAXN108_1044	0.279425	1.2198e-18	cysteine protease
SAXN108_1045	0.362892	1.5104e-26	Cysteine protease SspB
SAXN108_1046	0.405389	1.7444e-16	Glutamyl endopeptidase precursor%2C serine proteinase SspA
SAXN108_1093	0.632327	8.3567e-26	Dihydrolipoamide dehydrogenase
SAXN108_1099	0.59455	1.9892e-23	spermidine/putrescine ABC transporter substrate-binding protein
SAXN108_1118	0.637541	2.3693e-05	hypothetical protein
SAXN108_1126	0.642685	0.013637	NPQTN cell wall anchored protein IsdC
SAXN108_1131	0.204465	0.0086185	heme-degrading monooxygenase IsdG
SAXN108_1180	0.530453	4.0738e-19	Phospho-N-acetylmuramoyl-pentapeptide-transferase
SAXN108_1181	0.546776	9.0816e-13	UDP-N-acetylmuramoylalanine--D-glutamate ligase
SAXN108_1182	0.625284	1.021e-16	Cell division protein FtsQ
SAXN108_1230	0.506566	2.4369e-25	Malonyl CoA-acyl carrier protein transacylase
SAXN108_1231	0.523514	7.7587e-31	3-oxoacyl-[acyl-carrier protein] reductase
SAXN108_1264	0.627221	3.5193e-10	Phosphatidate cytidylyltransferase
SAXN108_1284	0.649948	0.0021564	putative short chain dehydrogenase
SAXN108_1301	0.652763	0.00031738	DNA mismatch repair protein MutL
SAXN108_1350	0.632061	3.6056e-07	gamma-aminobutyrate permease
SAXN108_1395	0.492746	6.4105e-05	putative oligopeptide transporter ATPase
SAXN108_1397	0.600615	0.0036462	putative oligopeptide transport system permease
SAXN108_1408	0.510872	5.7812e-17	Aspartokinase
SAXN108_1410	0.56509	2.3882e-12	Aspartate-semialdehyde dehydrogenase
SAXN108_1411	0.588808	0.00026685	Dihydrodipicolinate synthase
SAXN108_1412	0.642057	3.4628e-05	Dihydrodipicolinate reductase
SAXN108_1478	0.650147	9.1414e-13	hypothetical protein
SAXN108_1507	0.440657	7.4065e-06	hypothetical protein
SAXN108_1511	0.373613	2.7193e-60	hypothetical protein
SAXN108_1513	0.504594	0.00065956	hypothetical protein
SAXN108_1558	0.564119	3.9395e-29	Glycine dehydrogenase [decarboxylating] (glycine cleavage system P2 protein)
SAXN108_1587	0.628545	3.0172e-20	Glycyl-tRNA synthetase
SAXN108_1606	0.52878	4.8804e-26	Chaperone protein DnaK
SAXN108_1607	0.584578	7.3169e-12	Heat shock protein GrpE
SAXN108_1608	0.50764	8.5745e-17	Heat-inducible transcription repressor HrcA
SAXN108_1798	0.332169	8.5345e-10	6%2C7-dimethyl-8-ribityllumazine synthase
SAXN108_1799	0.352375	1.1151e-17	3%2C4-dihydroxy-2-butanone 4-phosphate synthase / GTP cyclohydrolase II
SAXN108_1800	0.543797	9.4225e-09	riboflavin synthase subunit alpha
SAXN108_1801	0.471547	3.4633e-14	Diaminohydroxyphosphoribosylaminopyrimidine deaminase / 5-amino-6-(5-phosphoribosylamino)uracil reductase
SAXN108_1853	0.501924	0.0016102	lantibiotic biosynthesis protein
SAXN108_1855	0.430732	0.046788	lantibiotic protein
SAXN108_1981	0.442161	2.1853e-52	Two component transcriptional regulator VraR
SAXN108_1982	0.435584	4.8185e-28	Sensor histidine kinase VraS
SAXN108_1983	0.456151	4.4322e-23	Transporter associated with VraSR
SAXN108_1985	0.452248	1.6227e-32	hypothetical protein
SAXN108_1995	0.520732	3.4149e-24	23S rRNA Uracil-5- -methyltransferase RumA
SAXN108_2036	0.658803	0.00039865	putative ABC transporter ATP-binding protein
SAXN108_2103	0.523416	1.5102e-19	Phage repressor
SAXN108_2104	0.481214	2.0642e-13	DNA helicase%2C phage-associated
SAXN108_2112	0.519917	0.0016057	hypothetical protein
SAXN108_2121	0.531397	4.3881e-33	co-chaperonin GroEL
SAXN108_2122	0.534696	1.1201e-06	10 kDa chaperonin
SAXN108_2137	0.181016	0.00025059	hypothetical protein
SAXN108_2138	0.130866	1.601e-24	YeeE/YedE family protein
SAXN108_2139	0	2.1943e-156	Site-specific recombinase
SAXN108_2140	0	3.4061e-48	hypothetical protein
SAXN108_2144	0	7.1074e-06	phage protein
SAXN108_2147	0	0.0025692	phage protein
SAXN108_2148	0	3.1671e-05	ribonucleoside-diphosphate reductase subunit
SAXN108_2150	0	2.9775e-20	ribonucleoside-diphosphate reductase
SAXN108_2154	0	1.3846e-11	hypothetical protein
SAXN108_2155	0	1.2564e-23	hypothetical protein
SAXN108_2160	0	7.0311e-06	phage C-5 cytosine-specific DNA methylase
SAXN108_2161	0	0.0003912	phage putative methyltransferase
SAXN108_2163	0	1.4538e-05	Phage protein
SAXN108_2169	0	6.0233e-99	hypothetical protein
SAXN108_2170	0	6.7444e-99	DNA ligase%2C phage-associated
SAXN108_2171	0	1.4318e-12	hypothetical protein
SAXN108_2172	0	2.1546e-12	hypothetical protein
SAXN108_2173	0	7.5628e-59	DNA polymerase III alpha subunit
SAXN108_2174	0	8.4327e-66	DNA polymerase III alpha subunit
SAXN108_2177	0	1.4153e-06	6'-aminoglycoside N-acetyltransferase (AAC(6')) / 2''-aminoglycoside phosphotransferase
SAXN108_2181	0	1.1067e-60	hypothetical protein
SAXN108_2182	0	1.3147e-171	hypothetical protein
SAXN108_2183	0	0	Aminoglycoside 3'-phosphotransferase
SAXN108_2184	0	7.8429e-202	Streptothricin acetyltransferase
SAXN108_2185	0	8.1252e-125	streptomycin adenylyltransferase family protein
SAXN108_2186	0	1.7636e-95	hypothetical protein
SAXN108_2187	0	0.0014463	hypothetical protein
SAXN108_2191	0	0	phage protein
SAXN108_2192	0	0	phage protein
SAXN108_2193	0	1.0109e-06	phage protein
SAXN108_2194	0	0.00077976	hypothetical protein
SAXN108_2195	0	0.0090153	hypothetical protein
SAXN108_2196	0	7.9283e-14	phage putative phosphoesterase
SAXN108_2218	0	0.038451	hypothetical protein
SAXN108_2221	0	8.6235e-15	phage protein
SAXN108_2222	0	1.9812e-42	phage metallo-beta-lactamase superfamily protein
SAXN108_2223	0	3.8074e-53	phage putative phosphoesterase
SAXN108_2224	0	3.3455e-11	phage protein
SAXN108_2225	0	4.8732e-23	phage protein
SAXN108_2226	0	3.5297e-09	phage protein
SAXN108_2227	0	1.3127e-59	hypothetical protein
SAXN108_2228	0	5.3273e-37	hypothetical protein
SAXN108_2229	0	2.5884e-41	hypothetical protein
SAXN108_2230	0	2.4605e-41	hypothetical protein
SAXN108_2231	0	1.1369e-12	hypothetical protein
SAXN108_2232	0	0	phage protein
SAXN108_2233	0	0	phage protein
SAXN108_2234	0	4.6614e-75	phage integrase
SAXN108_2235	0	3.5587e-07	hypothetical protein
SAXN108_2236	0	4.333e-08	hypothetical protein
SAXN108_2237	0	1.9259e-14	hypothetical protein
SAXN108_2238	0	8.119e-05	transposase
SAXN108_2240	0	1.1187e-10	hypothetical protein
SAXN108_2241	0	0.0015835	hypothetical protein
SAXN108_2242	0	1.7832e-19	hypothetical protein
SAXN108_2243	0	2.432e-25	hypothetical protein
SAXN108_2248	0	6.3574e-07	hypothetical protein
SAXN108_2249	0	2.7607e-38	hypothetical protein
SAXN108_2250	0	4.5678e-09	hypothetical protein
SAXN108_2252	0	3.6616e-35	phage protein
SAXN108_2253	0	3.8728e-12	hypothetical protein
SAXN108_2254	0	5.0033e-110	phage DNA-binding protein
SAXN108_2256	0	3.5111e-143	Phage protein
SAXN108_2257	0	1.4613e-65	hypothetical protein
SAXN108_2258	0	1.3462e-76	hypothetical protein
SAXN108_2259	0	7.7221e-51	hypothetical protein
SAXN108_2260	0	1.8052e-101	hypothetical protein
SAXN108_2261	0	2.5069e-87	hypothetical protein
SAXN108_2262	0	7.5556e-224	hypothetical protein
SAXN108_2263	0	1.0018e-38	hypothetical protein
SAXN108_2264	0	2.9481e-09	hypothetical protein
SAXN108_2266	0	1.0661e-07	hypothetical protein
SAXN108_2267	0	6.3028e-07	hypothetical protein
SAXN108_2268	0	1.3568e-09	hypothetical protein
SAXN108_2269	0	9.5631e-192	hypothetical protein
SAXN108_2270	0	2.5751e-11	hypothetical protein
SAXN108_2271	0	0.0043443	hypothetical protein
SAXN108_2272	0	3.9477e-25	hypothetical protein
SAXN108_2273	0	7.3821e-255	hypothetical protein
SAXN108_2274	0	4.7157e-49	hypothetical protein
SAXN108_2275	0	3.6997e-160	hypothetical protein
SAXN108_2276	0	1.6794e-05	hypothetical protein
SAXN108_2278	0	1.4044e-44	hypothetical protein
SAXN108_2280	0	0.0037892	hypothetical protein
SAXN108_2281	0	4.0613e-06	phage protein
SAXN108_2282	0	6.1514e-09	phage protein
SAXN108_2283	0	0.00021524	hypothetical protein
SAXN108_2284	0	3.2301e-77	phage amidase
SAXN108_2285	0	1.6643e-21	hypothetical protein
SAXN108_2286	0	5.0424e-40	hypothetical protein
SAXN108_2287	0	0.0012007	hypothetical protein
SAXN108_2316	0.63423	0.022809	Holo-[acyl-carrier protein] synthase
SAXN108_2317	0.624997	0.0063313	hypothetical protein
SAXN108_2324	0.564725	0.00095867	response regulator protein
SAXN108_2336	0.563631	0.0038551	Thiamin-phosphate pyrophosphorylase
SAXN108_2341	0.158676	2.1866e-10	hypothetical protein
SAXN108_2398	0.38027	1.6129e-37	Glucosamine--fructose-6-phosphate aminotransferase [isomerizing]
SAXN108_2399	0.490393	1.0628e-60	Glucosamine--fructose-6-phosphate aminotransferase [isomerizing]
SAXN108_2422	0.630153	0.0037521	FecCD transport family protein
SAXN108_2424	0.548194	3.5343e-13	putative transport system binding lipoprotein
SAXN108_2428	0.391381	6.2631e-05	major facilitator superfamily transporter
SAXN108_2456	0.630469	7.8189e-08	M23/M37 peptidase domain-containing protein
SAXN108_2457	0.575833	1.0353e-16	hypothetical protein
SAXN108_2473	0.659216	8.9422e-15	50S ribosomal protein L17
SAXN108_2489	0.624506	4.4616e-12	50S ribosomal protein L14
SAXN108_2490	0.656407	1.3953e-06	30S ribosomal protein S17
SAXN108_2535	0.494564	0.0056719	hypothetical protein
SAXN108_2536	0.4958	0.0036752	Urease gamma subunit
SAXN108_2537	0.449194	0.00099304	Urease beta subunit
SAXN108_2538	0.4128	1.1945e-21	Urease alpha subunit
SAXN108_2539	0.411385	0.0003912	Urease accessory protein UreE
SAXN108_2540	0.423127	4.2873e-10	Urease accessory protein UreF
SAXN108_2541	0.434976	7.501e-11	Urease accessory protein UreG
SAXN108_2542	0.448291	1.1101e-15	Urease accessory protein UreD
SAXN108_2593	0.563786	1.2705e-25	hypothetical protein
SAXN108_2606	0.502174	0.0013961	Teicoplanin resistance associated membrane protein TcaA
SAXN108_2607	0.522068	1.8881e-24	membrane protein
SAXN108_2616	0.641375	0.00081441	hypothetical protein
SAXN108_2636	0.627901	9.8401e-17	hypothetical protein
SAXN108_2670	0.646163	1.4424e-05	putative transport system protein
SAXN108_2679	0.450796	0.042697	putative 6-carboxyhexanoate--CoA ligase
SAXN108_2685	0.360268	9.5863e-07	Transport ATP-binding protein CydD
SAXN108_2688	0.635888	4.0738e-19	hypothetical protein
SAXN108_2742	0.552605	0.001534	hypothetical protein
SAXN108_2755	0.543699	1.9164e-22	Transcriptional regulator%2C MerR family
SAXN108_2756	0.629205	5.3664e-08	hypothetical protein
SAXN108_2807	0.590962	2.6201e-08	hypothetical protein
SAXN108_2810	0.628884	1.7571e-10	D-isomer specific 2-hydroxyacid dehydrogenase
SAXN108_2813	0.637923	1.0852e-05	squalene desaturase
SAXN108_2814	0.6261	9.3389e-16	putative glycosyl transferase
SAXN108_2844	0.611374	0.00091638	hypothetical protein
SAXN108_2865	0.567356	0.001503	hypothetical protein
SAXN108_2881	0.189763	1.1767e-138	Choline dehydrogenase
SAXN108_2882	0.44382	9.6995e-47	Betaine aldehyde dehydrogenase
SAXN108_2884	0.293366	1.3756e-47	choline transporter
SAXN108_2898	0.384238	0.0017301	alkaline phosphatase III
SAXN108_2908	0.440263	2.061e-28	Zinc metalloproteinase precursor
SAXN108_2923	0.599031	0.00060596	hypothetical protein
SAXN108_2928	0.496108	0.00016065	hypothetical protein
SAXN108_2929	0.359661	2.0043e-09	hypothetical protein
SAXN108_2930	0.357741	0.00010075	hypothetical protein
SAXN108_2947	0.502692	0.010534	HisF cyclase-like protein
SAXN108_2948	0.576597	0.0082838	Phosphoribosylformimino-5-aminoimidazole carboxamide ribotide isomerase
SAXN108_2949	0.274196	3.1291e-06	putative amidotransferase
SAXN108_2962	0.597132	2.3296e-11	hypothetical protein
SAXN108_2971	0.630276	2.1298e-11	putative nickel transport protein
SAXN108_2973	0.55787	3.1748e-38	hypothetical protein
