# Supplementary material for: Reconstruction of the Vancomycin-Susceptible Staphylococcus aureus Phenotype From a Vancomycin-Intermediate S. aureus XN108
Source: Front Microbiol. 2018 Nov 28;9:2955. doi: 10.3389/fmicb.2018.02955 (PMC6279853; doi:10.3389/fmicb.2018.02955)
Supplement: Supplementary file 4 [file Table_3.XLSX]

## Sheet: Sheet1
Table S5. Differentailly regulated genes KS65 compared to K65.
Gene_id	FoldChange	padj	Description
Up regulated
SAXN108_0086	1.69608	0.043234	1-phosphatidylinositol phosphodiesterase
SAXN108_0135	1.6221	2.75e-08	capsular polysaccharide synthesis enzyme
SAXN108_0305	1.66146	1.82e-20	Triacylglycerol lipase
SAXN108_0306	1.72998	3.09e-11	Triacylglycerol lipase
SAXN108_0433	1.72964	1.11e-11	putative sodium:dicarboxylate symporter protein
SAXN108_0582	1.90694	4.82e-13	Serine acetyltransferase
SAXN108_0583	1.59769	0.001109	Cysteinyl-tRNA synthetase
SAXN108_0614	1.51297	0.02013	cytosine deaminase
SAXN108_0617	2.09501	0.0013113	serine-aspartate repeat-containing protein C
SAXN108_0618	1.62523	1.18e-05	serine-aspartate repeat-containing protein D
SAXN108_0653	1.71419	0.0054944	repetative hypothetical protein
SAXN108_0699	1.60044	3.6e-07	ABC transporter ATP-binding protein
SAXN108_0728	1.72749	0.00024005	ABC transporter ATP-binding protein
SAXN108_0955	3.75281	2.91e-20	Argininosuccinate lyase
SAXN108_0956	3.53551	1.79e-14	Argininosuccinate synthase
SAXN108_0981	1.5963	1.51e-06	Oligopeptide transport system permease protein OppC
SAXN108_1022	2.29003	0.0025519	Competence transcription factor
SAXN108_1031	1.74497	0.023887	hypothetical protein
SAXN108_1061	2.53845	2.98e-25	Phosphoribosylaminoimidazole carboxylase catalytic subunit
SAXN108_1062	2.54726	3.88e-10	Phosphoribosylaminoimidazole carboxylase ATPase subunit
SAXN108_1063	2.60384	2.35e-10	Phosphoribosylaminoimidazole-succinocarboxamide synthase%2C PurS subunit
SAXN108_1065	2.75685	0.0012861	Phosphoribosylformylglycinamidine synthase%2C glutamine amidotransferase subunit
SAXN108_1066	2.8695	1.25e-11	phosphoribosylformylglycinamidine synthase II
SAXN108_1067	2.65878	5.74e-20	Amidophosphoribosyltransferase
SAXN108_1068	2.463	6.53e-09	Phosphoribosylformylglycinamidine cyclo-ligase
SAXN108_1069	2.55952	3.01e-09	Phosphoribosylglycinamide formyltransferase
SAXN108_1070	2.23574	3.08e-11	IMP cyclohydrolase / Phosphoribosylaminoimidazolecarboxamide formyltransferase
SAXN108_1071	2.03509	8.39e-33	Phosphoribosylamine--glycine ligase
SAXN108_1165	1.53023	7.25e-05	Ornithine carbamoyltransferase
SAXN108_1380	2.07491	0.00044926	DNA polymerase V
SAXN108_1458	1.51209	0.000213	Amino acid permease
SAXN108_1558	1.83997	3.33e-24	Glycine dehydrogenase [decarboxylating] (glycine cleavage system P2 protein)
SAXN108_1559	2.11076	1.06e-08	Glycine dehydrogenase [decarboxylating] (glycine cleavage system P1 protein)
SAXN108_1560	2.81108	1.26e-47	Aminomethyltransferase glycine cleavage system T protein
SAXN108_1688	1.59817	0.012264	type III leader peptidase family protein
SAXN108_1858	1.50323	0.028185	hypothetical protein
SAXN108_1887	2.10124	0.0012277	putative extracellular glutamine-bindingprotein
SAXN108_2025	1.72646	0.023557	hypothetical protein
SAXN108_2128	1.57324	1.21e-10	delta-hemolysin precursor
SAXN108_2421	1.84508	1.09e-09	hypothetical protein
SAXN108_2793	1.59569	0.00010488	hypothetical protein
SAXN108_2841	1.9165	1.76e-31	Beta-lactamase
Down regulated
SAXN108_0011	0.529464	9.5768e-17	Seryl-tRNA synthetase
SAXN108_0018	0.648511	3.3766e-08	DnaB-like helicase
SAXN108_0176	0.473746	5.75e-05	hypothetical protein
SAXN108_0216	0.639917	0.00025165	hypothetical protein
SAXN108_0221	0.542769	0.0047216	PTS system%2C maltose and glucose-specific IIC component
SAXN108_0298	0.536798	6.7205e-14	sodium:solute symporter family protein
SAXN108_0299	0.623843	1.6835e-05	N-acetylneuraminate lyase
SAXN108_0307	0.511665	0.010196	Phage integrase
SAXN108_0383	0.623471	0.011346	hypothetical protein
SAXN108_0443	0.158885	3.6211e-13	hypothetical protein
SAXN108_0444	0.142197	1.6216e-113	hypothetical protein
SAXN108_0446	0.631307	3.1605e-05	Tetracycline resistance protein TetM
SAXN108_0447	0.547993	0.0095269	Tetracycline resistance protein TetM
SAXN108_0463	0.232719	0.018534	hypothetical protein
SAXN108_0503	0.578964	4.0166e-18	hypothetical protein
SAXN108_0743	0.621981	0.0012277	membrane protein%2C putative
SAXN108_0749	0.635637	3.2793e-09	hypothetical protein
SAXN108_0766	0.451569	0.00020225	Transcriptional repressor of the fructose operon%2C DeoR family
SAXN108_0767	0.417894	9.4055e-09	1-phosphofructokinase
SAXN108_0768	0.211156	4.8849e-51	hypothetical protein
SAXN108_0884	0.59497	0.019308	pathogenicity island protein%2C integrase
SAXN108_0930	0.565453	0.0097869	Polyglycerophosphate chain D-alanine transfer protein DltD
SAXN108_1018	0.58741	8.3045e-07	Toxic anion resistance protein
SAXN108_1023	0.583465	2.9235e-20	hypothetical protein
SAXN108_1185	0.605186	1.5356e-09	hypothetical protein
SAXN108_1197	0.568537	3.624e-05	Uracil permease
SAXN108_1198	0.459913	6.5139e-06	Aspartate carbamoyltransferase
SAXN108_1199	0.464622	1.7958e-10	Dihydroorotase
SAXN108_1200	0.459211	9.6303e-09	Carbamoyl-phosphate synthase small chain
SAXN108_1201	0.450964	1.2468e-27	Carbamoyl-phosphate synthase large chain
SAXN108_1202	0.502125	3.3122e-06	Orotidine 5'-phosphate decarboxylase
SAXN108_1203	0.54567	0.0037539	Orotate phosphoribosyltransferase
SAXN108_1272	0.622182	0.038632	putative ribosomal protein
SAXN108_1273	0.646137	5.9511e-11	Translation initiation factor 2
SAXN108_1283	0.627207	7.11e-05	putative protease
SAXN108_1284	0.564957	0.0094972	putative short chain dehydrogenase
SAXN108_1313	0.591749	5.5497e-12	glutamine synthetase
SAXN108_1314	0.498294	1.4469e-47	Glutamine synthetase
SAXN108_1403	0.516397	0.00027173	Phosphate transport system permease protein PstC
SAXN108_1426	0.493788	5.1244e-07	Branched-chain amino acid transport system carrier protein
SAXN108_1427	0.317428	3.3241e-24	hypothetical protein
SAXN108_1428	0.351849	8.1367e-19	hypothetical protein
SAXN108_1485	0.572564	0.035377	hypothetical protein
SAXN108_1514	0.53363	1.3723e-18	sensor kinase SrrB
SAXN108_1587	0.297398	2.2545e-138	Glycyl-tRNA synthetase
SAXN108_1606	0.571911	2.502e-15	Chaperone protein DnaK
SAXN108_1607	0.587002	4.0809e-06	Heat shock protein GrpE
SAXN108_1608	0.561323	1.569e-12	Heat-inducible transcription repressor HrcA
SAXN108_1615	0.411398	0.014198	Late competence protein ComEA%2C DNA receptor
SAXN108_1656	0.658376	1.7505e-12	hypothetical protein
SAXN108_1696	0.62679	0.035356	Uroporphyrinogen-III synthase
SAXN108_1760	0.399862	1.5766e-38	haptoglobin-binding surface protein
SAXN108_1798	0.625181	0.011536	6%2C7-dimethyl-8-ribityllumazine synthase
SAXN108_1933	0.496493	0.023738	Phage minor capsid protein
SAXN108_1937	0.513577	0.025768	Phage protein
SAXN108_2036	0.651653	0.0017044	putative ABC transporter ATP-binding protein
SAXN108_2046	0.592991	8.0241e-09	Phage lysin%2C N-acetylmuramoyl-L-alanine amidase
SAXN108_2051	0.3814	0.0025724	hypothetical protein
SAXN108_2106	0.538606	0.0001322	hypothetical protein within prophage
SAXN108_2121	0.62181	7.1145e-17	co-chaperonin GroEL
SAXN108_2122	0.557561	2.7911e-07	10 kDa chaperonin
SAXN108_2391	0.45345	0.029728	zinc and cobalt transport repressor protein
SAXN108_2422	0.546033	0.00035668	FecCD transport family protein
SAXN108_2423	0.591865	0.015426	iron compound ABC transporter permease
SAXN108_2447	0.651364	2.179e-15	Galactose-6-phosphate isomerase%2C LacB subunit
SAXN108_2448	0.640858	2.0053e-10	Galactose-6-phosphate isomerase%2C LacA subunit
SAXN108_2459	0.4622	3.8458e-09	Alpha-acetolactate decarboxylase
SAXN108_2538	0.630639	5.2248e-06	Urease alpha subunit
SAXN108_2540	0.534237	0.00017738	Urease accessory protein UreF
SAXN108_2541	0.592348	0.0011077	Urease accessory protein UreG
SAXN108_2542	0.581777	5.1555e-06	Urease accessory protein UreD
SAXN108_2602	0.610872	7.8816e-05	putative transport protein
SAXN108_2672	0.548947	2.2703e-12	cation efflux family protein
